# Supplementary material for: Synthesis and properties of a well-defined copolymer of chlorotrifluoroethylene and N-vinylpyrrolidone by xanthate-mediated radical copolymerization under 60Co γ-ray irradiation
Source: Royal Society of Chemistry journal article supplement (doi:10.1039/c4py00902a), 2014-01-01
Supplement: c4py00902a1.pdf [file c4py00902a1.pdf]

## Electronic Supplementary Information

### **Synthesis and Property of Well-Defined Copolymer of Chlorotrifluoroethylene and *N*-Vinylpyrrolidone by Xanthate-Mediated Radical Copolymerization under $^{60}\text{Co}$ $\gamma$ -ray Irradiation**

Pucheng Wang,<sup>a</sup> Jingwen Dai,<sup>a</sup> Lei Liu,<sup>a</sup> Qibao Dong,<sup>a</sup> Hu Wang,<sup>b,\*</sup> Ruke Bai<sup>a,\*</sup>

<sup>a</sup> *CAS Key Laboratory of Soft Matter Chemistry, Department of Polymer Science and Engineering, University of Science and Technology of China, Hefei 230026, People's Republic of China*

<sup>b</sup> *Center of Analysis and Testing of China National Metrology Accredited Laboratory, Anhui University, Anhui University, Hefei 230039, People's Republic of China*

#### **Synthesize of S-benzyl O-ethyl dithiocarbonate (BEDTC)**

BEDTC was synthesized according to a previous literature.<sup>1</sup> The synthesis was conducted by stirring 40 mL ethanol and 5.6 g KOH (0.10 mol) until a clear solution was formed. 20 mL CS<sub>2</sub> (0.33 mol) was slowly added into the solution, and the mixture was stirred for 10 h at room temperature before excess CS<sub>2</sub> was distilled off at 70 °C. Then 10 mL Benzyl chloride (0.087 mol) in 20 mL of ethanol was added to the residual solution, and the mixture was further stirred at 60 °C for 5 h. After removal of the inorganic salt and most of the ethanol, 50 mL water was added and the solution was extracted with diethyl ether (3×40 mL). The combined organic layer was dried over anhydrous Na<sub>2</sub>SO<sub>4</sub>. Removal of the inorganic salt and evaporation of the solvent afforded a yellow oil product: 12.1 g, 65.8%. <sup>1</sup>H and <sup>13</sup>C NMR spectra are shown in Fig. S1 and Fig. S2, respectively.

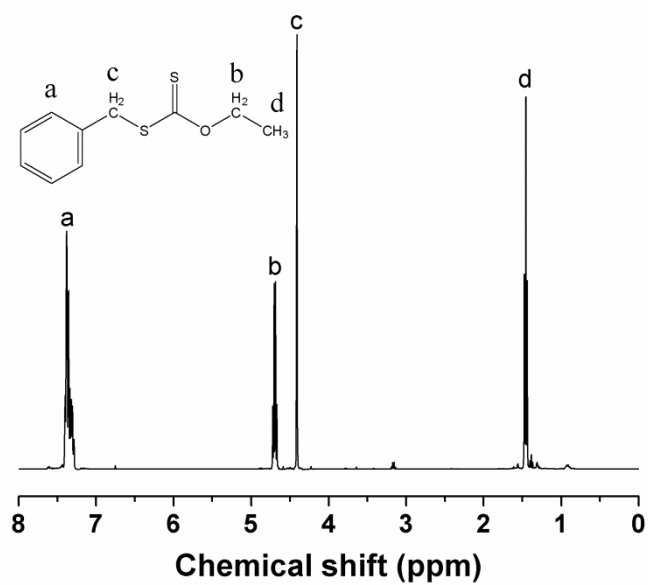

**Fig. S1**  $^1\text{H}$  NMR spectrum of BEDTC recorded in  $\text{CDCl}_3$  at room temperature.

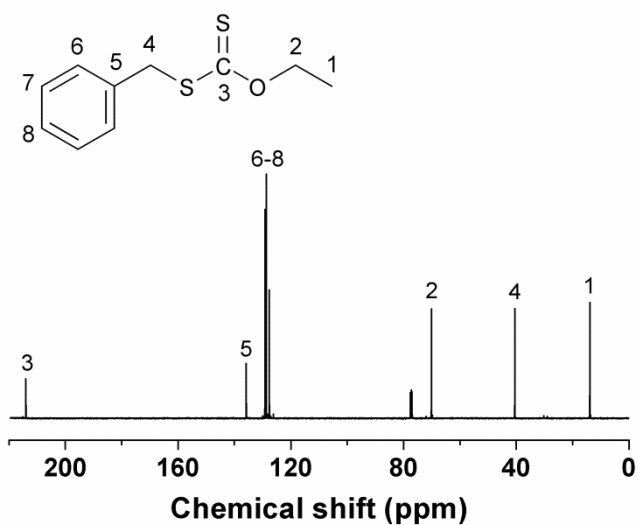

**Fig. S2**  $^{13}\text{C}$  NMR spectrum of BEDTC recorded in  $\text{CDCl}_3$  at room temperature.

#### Molecular weight of the resulted copolymer

The molecular weights determined by GPC ( $M_{n,\text{GPC}}$ ) are higher than the theoretical values, which is shown in Fig. S3.

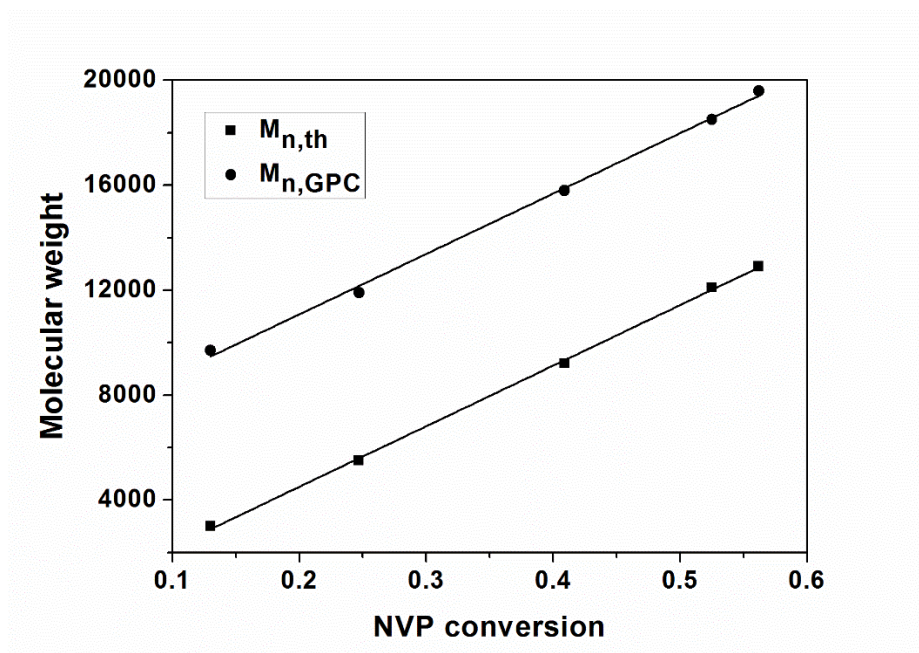

**Fig. S3** The molecular weights determined by GPC ( $M_{n,GPC}$ ) and the theoretical values ( $M_{n,th}$ ) as a function of NVP conversion for the copolymerization of CTFE and NVP.

#### In vitro cytotoxicity of the fluorinated amphiphilic block copolymer

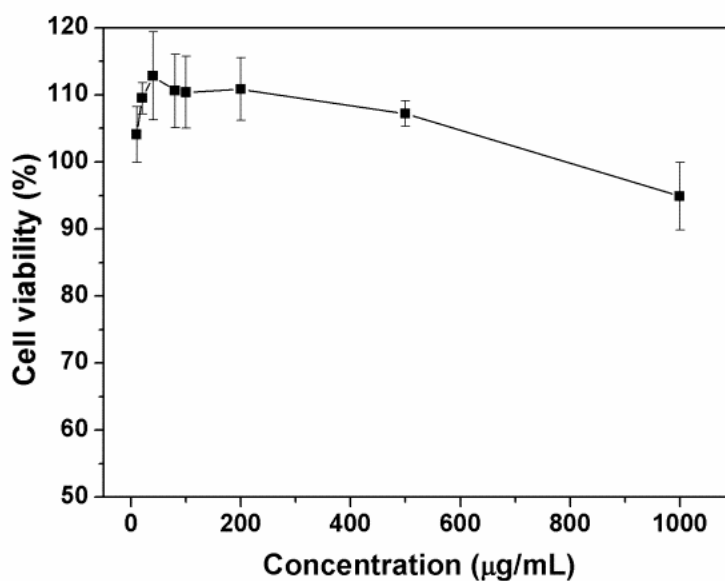

**Fig. S4** Cytotoxicity of the fluorinated amphiphilic block copolymer in L929 cells.

#### References:

- [1] D. C. Wan, K. Satoh, M. Kamigaito, Y. Okamoto, *Macromolecules*, 2005, **38**, 10397.
